# Supplementary material for: Evolution of dopamine receptors: phylogenetic evidence suggests a later origin of the DRD2l and DRD4rs dopamine receptor gene lineages
Source: PeerJ. 2018 Apr 13;6:e4593. doi: 10.7717/peerj.4593 (PMC5900934; doi:10.7717/peerj.4593)
Supplement: Table S1 [file peerj-06-4593-s001.xlsx]

## Sheet: Sheet1
Supplementary Table S1. Accession numbers of dopamine receptor genes used in this study
	Common name	Scientific name	Associated Gene Name	Accession number
Gnathostomata	Human	Homo sapiens	DRD1	ENSG00000184845
	Bushbaby	Otolemur garnettii	DRD1	ENSOGAG00000000909
	Chimpanzee	Pan troglodytes	DRD1	ENSPTRG00000017549
	Gibbon	Nomascus leucogenys	DRD1	ENSNLEG00000000551
	Gorilla	Gorilla gorilla	DRD1	ENSGGOG00000024972
	Macaque	Macaca mulatta	DRD1	ENSMMUG00000005147
	Marmoset	Callithrix jacchus	DRD1	ENSCJAG00000023215
	Mouse lemur	Microcebus murinus	DRD1	ENSMICG00000000124
	Olive baboon	Papio anubis	DRD1	ENSPANG00000017071
	Orangutan	Pongo pygmaeus	DRD1	ENSPPYG00000016062
	Vervet	Chlorocebus sabaeus	DRD1	ENSCSAG00000009491
	Guinea Pig	Cavia porcellus	DRD1	ENSCPOG00000009501
	Mouse	Mus musculus	DRD1	ENSMUSG00000021478
	Rabbit	Oryctolagus cuniculus	DRD1	ENSOCUG00000004825
	Rat	Rattus norvegicus	DRD1	ENSRNOG00000023688
	Squirrel	Spermophilus tridecemlineatus	DRD1	ENSSTOG00000029229
	Tree shrew	Tupaia belangeri	DRD1	ENSTBEG00000009429
	Armadillo	Dasypus novemcinctus	DRD1	ENSDNOG00000044944
	Elephant	Loxodonta africana	DRD1	ENSLAFG00000010433
	Alpaca	Vicugna pacos	DRD1	ENSVPAG00000010850
	Cat	Felis catus	DRD1	ENSFCAG00000000764
	Cow	Bos taurus	DRD1	ENSBTAG00000047719
	Dog	Canis lupus familiaris	DRD1	ENSCAFG00000016726
	Dolphin	Tursiops truncatus	DRD1	ENSTTRG00000011522
	Ferret	Mustela putorius furo	DRD1	ENSMPUG00000019314
	Hedgehog	Erinaceus europaeus	DRD1	ENSEEUG00000002795
	Horse	Equus caballus	DRD1	ENSECAG00000011620
	Microbat	Myotis lucifugus	DRD1	ENSMLUG00000017069
	Panda	Ailuropoda melanoleuca	DRD1	ENSAMEG00000006899
	Pig	Sus scrofa	DRD1	ENSSSCG00000024289
	Pig	Sus scrofa	DRD1	ENSSSCG00000029037
	Sheep	Ovis aries	DRD1	ENSOARG00000011552
	Opossum	Monodelphis domestica	DRD1	ENSMODG00000023683
	Platypus	Ornithorhynchus anatinus	DRD1	XM_007663434
	Tasmanian devil	Sarcophilus harrisii	DRD1	ENSSHAG00000001065
	Anole lizard	Anolis carolinensis	DRD1	ENSACAG00000015014
	Chinese turtle	Pelodiscus sinensis	DRD1	ENSPSIG00000000116
	Chicken	Gallus gallus	DRD1	ENSGALG00000003270
	Duck	Anas platyrhynchos	DRD1	ENSAPLG00000001868
	Flycatcher	Ficedula albicollis	DRD1	ENSFALG00000014407
	Turkey	Meleagris gallopavo	DRD1	ENSMGAG00000015442
	Zebra Finch	Taeniopygia guttata	DRD1	ENSTGUG00000000340
	Green sea turtle	Chelonia mydas	DRD1	XM_007054352
	Western painted turtle	Chrysemys picta bellii	DRD1	XM_005298072
	Burmese python	Python bivittatus	DRD1	XM_007433475
	Common garter snake	Thamnophis sirtalis	DRD1	XM_014053692
	Taiwan habu	Protobothrops mucrosquamatus	DRD1	XM_015822491
	Chinese alligator	Alligator sinensis	DRD1	XM_006028723
	American alligator	Alligator mississippiensis	DRD1	XM_006265023
	Amazon molly	Poecilia formosa	DRD1a	ENSPFOG00000020499
	Amazon molly	Poecilia formosa	DRD1b	ENSPFOG00000020219
	Cave fish	Astyanax mexicanus	DRD1a	ENSAMXG00000025106
	Cave fish	Astyanax mexicanus	DRD1b	ENSAMXG00000024960
	Cod	Gadus morhua	DRD1a	ENSGMOG00000015307
	Cod	Gadus morhua	DRD1b	ENSGMOG00000007967
	Fugu	Takifugu rubripes	DRD1a	ENSTRUG00000011080
	Fugu	Takifugu rubripes	DRD1b	ENSTRUG00000003589
	Medaka	Oryzias latipes	DRD1a	ENSORLG00000007303
	Medaka	Oryzias latipes	DRD1b	ENSORLG00000001681
	Platyfish	Xiphophorus maculatus	DRD1a	ENSXMAG00000019506
	Platyfish	Xiphophorus maculatus	DRD1b	ENSXMAG00000020293
	Spotted gar	Lepisosteus oculatus	DRD1	ENSLOCG00000010837
	Stickleback	Gasterosteus aculeatus	DRD1a	ENSGACG00000018420
	Stickleback	Gasterosteus aculeatus	DRD1b	ENSGACG00000020716
	Tetraodon	Tetraodon nigroviridis	DRD1	ENSTNIG00000018218
	Tilapia	Oreochromis niloticus	DRD1a	ENSONIG00000017686
	Tilapia	Oreochromis niloticus	DRD1b	ENSONIG00000021094
	Zebrafish	Danio rerio	DRD1a	ENSDARG00000071640
	Zebrafish	Danio rerio	DRD1b	ENSDARG00000038918
	Clawed frog	Xenopus tropicalis	DRD1	ENSXETG00000013921
	Coelacanth	Latimeria chalumnae	DRD1	ENSLACG00000017600
	Whale shark	Rhincodon typus	DRD1	XM_020536218
	Elephant shark	Callorhinchus milii	DRD1	XM_7906659
	Common name	Scientific name	Associated Gene Name	Accession number
Gnathostomata	Anole lizard	Anolis carolinensis	D1C	XM_008115320
	Schlegel's Japanese Gecko	Gekko japonicus	D1C	XM_015406617
	American alligator	Alligator mississippiensis	D1C	XM_014607795
	Saltwater crocodile	Crocodylus porosus	D1C	XM_019555519
	Gharial	Gavialis gangeticus	D1C	XM_019502113
	Chicken	Gallus gallus	D1C	ENSGALG00000006540
	Turkey	Meleagris gallopavo	D1C	ENSMGAG00000015332
	Flycatcher	Ficedula albicollis	D1C	ENSFALG00000015069
	Zebra Finch	Taeniopygia guttata	D1C	ENSTGUG00000008568
	Burmese python	Python bivittatus	D1C	XM_007437766
	Coelacanth	Latimeria chalumnae	D1C	XM_005991570
	Amazon molly	Poecilia formosa	D1C	ENSPFOG00000020170
	Amazon molly	Poecilia formosa	D1C	ENSPFOG00000017556
	Cave fish	Astyanax mexicanus	D1C	ENSAMXG00000024885
	Fugu	Takifugu rubripes	D1C	ENSTRUG00000001195
	Fugu	Takifugu rubripes	D1C	ENSTRUG00000001556
	Fugu	Takifugu rubripes	D1C	ENSTRUG00000004029
	Platyfish	Xiphophorus maculatus	D1C	ENSXMAG00000019749
	Platyfish	Xiphophorus maculatus	D1C	ENSXMAG00000020000
	Spotted gar	Lepisosteus oculatus	D1C	ENSLOCG00000018230
	Stickleback	Gasterosteus aculeatus	D1C	ENSGACG00000011076
	Tetraodon	Tetraodon nigroviridis	D1C	ENSTNIG00000003582
	Tilapia	Oreochromis niloticus	D1C	ENSONIG00000021009
	Zebrafish	Danio rerio	D1C	ENSDARG00000024873
	Zebrafish	Danio rerio	D1C	ENSDARG00000040765
	High Himalaya Frog	Nanorana parkeri	D1C	XM_018562675
	Clawed frog	Xenopus tropicalis	D1C	XM_004915891
	Elephant shark	Callorhinchus milii	D1C	XM_007899690
	Common name	Scientific name	Associated Gene Name	Accession number
Gnathostomata	Anole lizard	Anolis carolinensis	D1D	ENSACAG00000016632
	Chinese turtle	Pelodiscus sinensis	D1D	ENSPSIG00000001640
	Chinese alligator	Alligator sinensis	D1D	XM_006028933
	American alligator	Alligator mississippiensis	D1D	XM_006263907
	Chicken	Gallus gallus	D1D	ENSGALG00000026029
	Duck	Anas platyrhynchos	D1D	XM_013103324
	Turkey	Meleagris gallopavo	D1D	ENSMGAG00000015582
	Burmese python	Python bivittatus	D1D	XM_007426014
	Taiwan habu	Protobothrops mucrosquamatus	D1D	XM_015829699
	Common garter snake	Thamnophis sirtalis	D1D	XM_014068545
	Green sea turtle	Chelonia mydas	D1D	XM_007068338
	Western painted turtle	Chrysemys picta bellii	D1D	XM_005285241
	Spotted gar	Lepisosteus oculatus	D1D	ENSLOCG00000017983
	Coelacanth	Latimeria chalumnae	D1D	XM_005995245
	Zebrafish	Danio rerio	D1D	ENSDARG00000056284
	Elephant shark	Callorhinchus milii	D1D	XM_007909234
	Common name	Scientific name	Associated Gene Name	Accession number
Gnathostomata	Human	Homo sapiens	DRD2	ENSG00000149295
	Bushbaby	Otolemur garnettii	DRD2	ENSOGAG00000006407
	Chimpanzee	Pan troglodytes	DRD2	ENSPTRG00000004295
	Gibbon	Nomascus leucogenys	DRD2	ENSNLEG00000007309
	Gorilla	Gorilla gorilla	DRD2	ENSGGOG00000003244
	Macaque	Macaca mulatta	DRD2	ENSMMUG00000014334
	Marmoset	Callithrix jacchus	DRD2	ENSCJAG00000012246
	Olive baboon	Papio anubis	DRD2	ENSPANG00000005708
	Orangutan	Pongo pygmaeus	DRD2	ENSPPYG00000003885
	Vervet	Chlorocebus sabaeus	DRD2	ENSCSAG00000002807
	Guinea Pig	Cavia porcellus	DRD2	ENSCPOG00000009265
	Mouse	Mus musculus	DRD2	ENSMUSG00000032259
	Rabbit	Oryctolagus cuniculus	DRD2	ENSOCUG00000011657
	Rat	Rattus norvegicus	DRD2	ENSOCUG00000011657
	Squirrel	Spermophilus tridecemlineatus	DRD2	ENSSTOG00000003570
	Armadillo	Dasypus novemcinctus	DRD2	ENSDNOG00000007008
	Elephant	Loxodonta africana	DRD2	ENSLAFG00000006523
	Cat	Felis catus	DRD2	ENSFCAG00000008293
	Cow	Bos taurus	DRD2	ENSBTAG00000010860
	Dog	Canis lupus familiaris	DRD2	ENSCAFG00000013890
	Dolphin	Tursiops truncatus	DRD2	ENSTTRG00000007343
	Ferret	Mustela putorius furo	DRD2	ENSMPUG00000003877
	Hedgehog	Erinaceus europaeus	DRD2	ENSEEUG00000004688
	Horse	Equus caballus	DRD2	ENSECAG00000013567
	Microbat	Myotis lucifugus	DRD2	ENSMLUG00000011890
	Panda	Ailuropoda melanoleuca	DRD2	ENSAMEG00000006143
	Pig	Sus scrofa	DRD2	ENSSSCG00000015048
	Sheep	Ovis aries	DRD2	ENSOARG00000017850
	Anole lizard	Anolis carolinensis	DRD2	ENSACAG00000008768
	Chinese turtle	Pelodiscus sinensis	DRD2	ENSPSIG00000009999
	Chicken	Gallus gallus	DRD2	ENSGALG00000007794
	Duck	Anas platyrhynchos	DRD2	ENSAPLG00000009051
	Flycatcher	Ficedula albicollis	DRD2	ENSFALG00000000260
	Turkey	Meleagris gallopavo	DRD2	ENSMGAG00000004223
	Zebra Finch	Taeniopygia guttata	DRD2	ENSTGUG00000000255
	Green sea turtle	Chelonia mydas	DRD2	XM_007060471
	Western painted turtle	Chrysemys picta bellii	DRD2	XM_008172330
	Burmese python	Python bivittatus	DRD2	XM_007424574
	Taiwan habu	Protobothrops mucrosquamatus	DRD2	XM_015812921
	Chinese alligator	Alligator sinensis	DRD2	XM_006026660
	American alligator	Alligator mississippiensis	DRD2	XM_006265248
	Amazon molly	Poecilia formosa	DRD2	ENSPFOG00000006156
	Cave fish	Astyanax mexicanus	DRD2	ENSAMXG00000018359
	Cave fish	Astyanax mexicanus	DRD2b	ENSAMXG00000007381
	Cod	Gadus morhua	DRD2	ENSGMOG00000006531
	Fugu	Takifugu rubripes	DRD2	ENSTRUG00000014690
	Medaka	Oryzias latipes	DRD2	ENSORLG00000007515
	Platyfish	Xiphophorus maculatus	DRD2	ENSXMAG00000008934
	Spotted gar	Lepisosteus oculatus	DRD2	ENSLOCG00000004412
	Stickleback	Gasterosteus aculeatus	DRD2	ENSGACT00000012097
	Tetraodon	Tetraodon nigroviridis	DRD2	ENSTNIG00000007779
	Tilapia	Oreochromis niloticus	DRD2	ENSONIG00000006162
	Zebrafish	Danio rerio	DRD2a	ENSDARG00000056926
	Zebrafish	Danio rerio	DRD2b	ENSDARG00000011091
	Clawed frog	Xenopus tropicalis	DRD2	XM_018096048
	Coelacanth	Latimeria chalumnae	DRD2	XM_014490105
	Whale shark	Rhincodon typus	DRD2	XM_020522238
	Elephant shark	Callorhinchus milii	DRD2	XM_007908791
	Amazon molly	Poecilia formosa	DRD2l	ENSPFOG00000004526
	Cod	Gadus morhua	DRD2l	ENSGMOG00000012888
	Medaka	Oryzias latipes	DRD2l	ENSORLG00000015196
	Platyfish	Xiphophorus maculatus	DRD2l	ENSXMAG00000006548
	Spotted gar	Lepisosteus oculatus	DRD2l	ENSLOCG00000005675
	Stickleback	Gasterosteus aculeatus	DRD2l	ENSGACG00000012513
	Tetraodon	Tetraodon nigroviridis	DRD2l	ENSTNIG00000004342
	Tilapia	Oreochromis niloticus	DRD2l	ENSONIG00000007472
	Zebrafish	Danio rerio	DRD2l	ENSDARG00000014858
	Coelacanth	Latimeria chalumnae	DRD2l	ENSLACG00000007291
	Common name	Scientific name	Associated Gene Name	Accession number
Gnathostomata	Human	Homo sapiens	DRD3	ENSG00000151577
	Bushbaby	Otolemur garnettii	DRD3	ENSOGAG00000015072
	Chimpanzee	Pan troglodytes	DRD3	ENSPTRG00000015241
	Gibbon	Nomascus leucogenys	DRD3	ENSNLEG00000004740
	Marmoset	Callithrix jacchus	DRD3	ENSCJAG00000009251
	Olive baboon	Papio anubis	DRD3	ENSPANG00000025631
	Orangutan	Pongo pygmaeus	DRD3	ENSPPYG00000013529
	Tarsier	Tarsius syrichta	DRD3	ENSTSYG00000003431
	Vervet	Chlorocebus sabaeus	DRD3	ENSCSAG00000006929
	Mouse	Mus musculus	DRD3	ENSMUSG00000022705
	Rabbit	Oryctolagus cuniculus	DRD3	ENSOCUG00000002605
	Rat	Rattus norvegicus	DRD3	ENSRNOG00000060806
	Squirrel	Spermophilus tridecemlineatus	DRD3	ENSSTOG00000000307
	Armadillo	Dasypus novemcinctus	DRD3	ENSDNOG00000012315
	Elephant	Loxodonta africana	DRD3	ENSLAFG00000002472
	Hyrax	Procavia capensis	DRD3	ENSPCAG00000012455
	Cat	Felis catus	DRD3	ENSFCAG00000009553
	Cow	Bos taurus	DRD3	ENSBTAG00000002132
	Dog	Canis lupus familiaris	DRD3	ENSCAFG00000010787
	Dolphin	Tursiops truncatus	DRD3	ENSTTRG00000000181
	Ferret	Mustela putorius furo	DRD3	ENSMPUG00000000277
	Hedgehog	Erinaceus europaeus	DRD3	ENSETEG00000019290
	Horse	Equus caballus	DRD3	ENSECAG00000016540
	Microbat	Myotis lucifugus	DRD3	ENSMLUG00000004740
	Panda	Ailuropoda melanoleuca	DRD3	ENSAMEG00000005377
	Pig	Sus scrofa	DRD3	ENSSSCG00000011911
	Pig	Sus scrofa	DRD3	ENSSSCG00000028305
	Sheep	Ovis aries	DRD3	ENSOARG00000019596
	Opossum	Monodelphis domestica	DRD3	ENSMODG00000018173
	Wallaby	Macropus eugenii	DRD3	ENSMEUG00000006649
	Anole lizard	Anolis carolinensis	DRD3	ENSACAG00000009857
	Schlegel's Japanese Gecko	Gekko japonicus	DRD3	XM_015413573
	Chinese turtle	Pelodiscus sinensis	DRD3	ENSPSIG00000002508
	Chicken	Gallus gallus	DRD3	ENSGALG00000015117
	Duck	Anas platyrhynchos	DRD3	ENSAPLG00000002289
	Flycatcher	Ficedula albicollis	DRD3	ENSFALG00000006015
	Turkey	Meleagris gallopavo	DRD3	ENSMGAG00000014321
	Zebra Finch	Taeniopygia guttata	DRD3	ENSTGUG00000013405
	Green sea turtle	Chelonia mydas	DRD3	XM_007062084
	Burmese python	Python bivittatus	DRD3	XM_007431732
	American alligator	Alligator mississippiensis	DRD3	XM_006275091
	Amazon molly	Poecilia formosa	DRD3	ENSPFOG00000010006
	Cave fish	Astyanax mexicanus	DRD3	ENSAMXG00000014808
	Cod	Gadus morhua	DRD3	ENSGMOG00000002549
	Fugu	Takifugu rubripes	DRD3	ENSTRUG00000000584
	Medaka	Oryzias latipes	DRD3	ENSORLG00000009228
	Platyfish	Xiphophorus maculatus	DRD3	ENSXMAG00000010098
	Spotted gar	Lepisosteus oculatus	DRD3	ENSLOCG00000003166
	Stickleback	Gasterosteus aculeatus	DRD3	ENSGACG00000003265
	Tetraodon	Tetraodon nigroviridis	DRD3	ENSTNIG00000012726
	Tilapia	Oreochromis niloticus	DRD3	ENSONIG00000014071
	Zebrafish	Danio rerio	DRD3	ENSDARG00000032131
	Coelacanth	Latimeria chalumnae	DRD3	ENSLACG00000002004
	Elephant shark	Callorhinchus milii	DRD3	XM_007901104
	Common name	Scientific name	Associated Gene Name	Accession number
Gnathostomata	Human	Homo sapiens	DRD4	ENSG00000069696
	Bushbaby	Otolemur garnettii	DRD4	ENSOGAG00000028174
	Gibbon	Nomascus leucogenys	DRD4	ENSNLEG00000008469
	Gorilla	Gorilla gorilla	DRD4	ENSGGOG00000023542
	Macaque	Macaca mulatta	DRD4	ENSMMUG00000002658
	Olive baboon	Papio anubis	DRD4	ENSPANG00000025097
	Orangutan	Pongo pygmaeus	DRD4	ENSPPYG00000002876
	Vervet	Chlorocebus sabaeus	DRD4	ENSCSAG00000010793
	Mouse	Mus musculus	DRD4	ENSCSAG00000010793
	Rat	Rattus norvegicus	DRD4	ENSRNOG00000017927
	Squirrel	Spermophilus tridecemlineatus	DRD4	ENSSTOG00000023152
	Elephant	Loxodonta africana	DRD4	ENSLAFG00000023284
	Goat	Capra hircus	DRD4	XM_018043036
	Orca	Orcinus orca	DRD4	XM_004278149
	Pig	Sus scrofa	DRD4	ENSSSCG00000012851
	Opossum	Monodelphis domestica	DRD4	ENSMODG00000016594
	Wallaby	Macropus eugenii	DRD4	ENSMEUG00000011878
	Anole lizard	Anolis carolinensis	DRD4	ENSACAG00000015076
	Chinese turtle	Pelodiscus sinensis	DRD4	ENSPSIG00000016283
	Chicken	Gallus gallus	DRD4	ENSGALG00000005085_
	Duck	Anas platyrhynchos	DRD4	ENSAPLG00000011878
	Turkey	Meleagris gallopavo	DRD4	ENSMGAG00000003742
	Zebra Finch	Taeniopygia guttata	DRD4	ENSTGUG00000007173
	Burmese python	Python bivittatus	DRD4	XM_007436335
	Taiwan habu	Protobothrops mucrosquamatus	DRD4	XM_015811863
	Chinese alligator	Alligator sinensis	DRD4	XM_006019200
	American alligator	Alligator mississippiensis	DRD4	XM_006263418
	Amazon molly	Poecilia formosa	DRD4	ENSPFOG00000001435
	Cave fish	Astyanax mexicanus	DRD4a	ENSAMXG00000016558
	Cave fish	Astyanax mexicanus	DRD4b	ENSAMXG00000007190
	Cod	Gadus morhua	DRD4a	ENSGMOG00000010876
	Fugu	Takifugu rubripes	DRD4a	ENSTRUG00000015396
	Fugu	Takifugu rubripes	DRD4b	ENSTRUG00000012466
	Medaka	Oryzias latipes	DRD4b	ENSORLG00000000088
	Platyfish	Xiphophorus maculatus	DRD4b	ENSXMAG00000018374
	Spotted gar	Lepisosteus oculatus	DRD4	ENSLOCG00000002345
	Stickleback	Gasterosteus aculeatus	DRD4a	ENSGACG00000008935
	Tetraodon	Tetraodon nigroviridis	DRD4a	ENSTNIG00000008439
	Tetraodon	Tetraodon nigroviridis	DRD4a	ENSTNIG00000006556
	Tilapia	Oreochromis niloticus	DRD4a	ENSONIG00000003934
	Tilapia	Oreochromis niloticus	DRD4	ENSONIG00000015579
	Zebrafish	Danio rerio	DRD4a	ENSDARG00000038363
	Zebrafish	Danio rerio	DRD4b	ENSDARG00000035820
	Clawed frog	Xenopus tropicalis	DRD4	ENSXETG00000032197
	Coelacanth	Latimeria chalumnae	DRD4	ENSLACG00000014568
	Whale shark	Rhincodon typus	DRD4	XM_020528750
	Elephant shark	Callorhinchus milii	DRD4	XM_007909365
	Amazon molly	Poecilia formosa	DRD4rs	ENSPFOG00000013492
	Cave fish	Astyanax mexicanus	DRD4rs	ENSAMXG00000016199
	Cod	Gadus morhua	DRD4rs	ENSGMOG00000017269
	Medaka	Oryzias latipes	DRD4rs	ENSORLG00000020114
	Platyfish	Xiphophorus maculatus	DRD4rs	ENSXMAG00000013048
	Spotted gar	Lepisosteus oculatus	DRD4rs	ENSLOCG00000015570
	Tilapia	Oreochromis niloticus	DRD4rs	ENSONIG00000007597
	Zebrafish	Danio rerio	DRD4rs	ENSDARG00000001912
	Coelacanth	Latimeria chalumnae	DRD4rs	ENSLACG00000003250
	Common name	Scientific name	Associated Gene Name	Accession number
Gnathostomata	Human	Homo sapiens	DRD5	ENSG00000169676
	Bushbaby	Otolemur garnettii	DRD5	ENSOGAG00000000322
	Chimpanzee	Pan troglodytes	DRD5	ENSPTRG00000031262
	Gorilla	Gorilla gorilla	DRD5	ENSGGOG00000007931
	Macaque	Macaca mulatta	DRD5	ENSMMUG00000002783
	Marmoset	Callithrix jacchus	DRD5	ENSCJAG00000000106
	Olive baboon	Papio anubis	DRD5	ENSPANG00000023315
	Orangutan	Pongo pygmaeus	DRD5	ENSPPYG00000014604
	Vervet	Chlorocebus sabaeus	DRD5	ENSCSAG00000019701
	Guinea pig	Cavia porcellus	DRD5	ENSCPOG00000007877
	Mouse	Mus musculus	DRD5	ENSMUSG00000039358
	Rabbit	Oryctolagus cuniculus	DRD5	ENSOCUG00000026757
	Rat	Rattus norvegicus	DRD5	ENSRNOG00000005338
	Squirrel	Ictidomys tridecemlineatus	DRD5	ENSSTOG00000024357
	Elephant	Loxodonta africana	DRD5	ENSLAFG00000032155
	Armadillo	Dasypus novemcinctus	DRD5	ENSDNOG00000002203
	Cow	Bos taurus	DRD5	ENSBTAG00000038606
	Dog	Canis lupus familiaris	DRD5	ENSCAFG00000015664
	Ferret	Mustela putorius furo	DRD5	ENSMPUG00000019800
	Pig	Sus scrofa	DRD5	ENSSSCG00000008730
	Anole lizard	Anolis carolinensis	DRD5	ENSACAG00000010888
	Chinese alligator	Alligator sinensis	DRD5	XM_006016787
	American alligator	Alligator mississippiensis	DRD5	XM_006264733
	Chinese turtle	Pelodiscus sinensis	DRD5	ENSPSIG00000015073
	Green sea turtle	Chelonia mydas	DRD5	XM_007062951
	Western painted turtle	Chrysemys picta bellii	DRD5	XM_005300292
	Chicken	Gallus gallus	DRD5	ENSGALG00000014975
	Duck	Anas platyrhynchos	DRD5	ENSAPLG00000003023
	Flycatcher	Ficedula albicollis	DRD5	ENSFALG00000009387
	Zebra Finch	Taeniopygia guttata	DRD5	ENSTGUG00000009908
	Clawed frog	Xenopus tropicalis	DRD5	ENSXETG00000026496
	Coelacanth	Latimeria chalumnae	DRD5	ENSLACG00000001704
	Amazon molly	Poecilia formosa	DRD5	ENSPFOG00000009441
	Amazon molly	Poecilia formosa	DRD5	ENSPFOG00000019949
	Cave fish	Astyanax mexicanus	DRD5	ENSAMXG00000024877
	Cod	Gadus morhua	DRD5	ENSGMOG00000019864
	Cod	Gadus morhua	DRD5	ENSGMOG00000001158
	Fugu	Takifugu rubripes	DRD5	ENSTRUG00000013175
	Medaka	Oryzias latipes	DRD5	ENSORLG00000005721
	Platyfish	Xiphophorus maculatus	DRD5	ENSXMAG00000020171
	Platyfish	Xiphophorus maculatus	DRD5	ENSXMAG00000020065
	Spotted gar	Lepisosteus oculatus	DRD5	ENSLOCG00000018034
	Stickleback	Gasterosteus aculeatus	DRD5	ENSGACG00000016195
	Stickleback	Gasterosteus aculeatus	DRD5	ENSGACG00000009142
	Tetraodon	Tetraodon nigroviridis	DRD5	ENSTNIG00000011106
	Tetraodon	Tetraodon nigroviridis	DRD5	ENSTNIG00000005178
	Tilapia	Oreochromis niloticus	DRD5	ENSONIG00000020812
	Tilapia	Oreochromis niloticus	DRD5	ENSONIG00000009021
	Zebrafish	Danio rerio	DRD5	ENSDARG00000037576
	Elephant shark	Callorhinchus milii	DRD5	XM_007897345
	Common name	Scientific name	Associated Gene Name	Accession number
Cyclostomes	Sea Lamprey	Petromyzon marinus	D2-like family	ENSPMAG00000000994
	Sea Lamprey	Petromyzon marinus	D1-like family	ENSPMAG00000010421
	Sea Lamprey	Petromyzon marinus	D2-like family	ENSPMAG00000009618
	Atlantic hagfish	Myxine glutinosa	D1-like family	CAA06542
	Common name	Scientific name	Associated Gene Name	Accession number
	Human	Homo sapiens	ADRA1A	ENSG00000120907
	Human	Homo sapiens	ADRA1B	ENSG00000170214
	Human	Homo sapiens	ADRA1D	ENSG00000171873
	Human	Homo sapiens	ADRA2A	ENSG00000150594
	Mouse	Mus musculus	ADRA2A	ENSMUSG00000033717
	Rat	Rattus norvegicus	ADRA2A	ENSRNOG00000047545
	Cat	Felis catus	ADRA2A	NM_001039955
	Pig	Sus scrofa	ADRA2A	ENSSSCG00000010629
	Chicken	Gallus gallus	ADRA2A	ENSGALG00000023521
	Flycatcher	Ficedula albicollis	ADRA2A	ENSFALG00000015080
	Human	Homo sapiens	ADRA2B	ENSG00000274286
	Mouse	Mus musculus	ADRA2B	ENSMUSG00000058620
	Rat	Rattus norvegicus	ADRA2B	ENSRNOG00000013887
	Cat	Felis catus	ADRA2B	ENSFCAG00000022120
	Cow	Bos taurus	ADRA2B	ENSBTAG00000009510
	Human	Homo sapiens	ADRA2C	ENSG00000184160
	Mouse	Mus musculus	ADRA2C	ENSMUSG00000045318
	Rat	Rattus norvegicus	ADRA2C	ENSRNOG00000009299
	Pig	Sus scrofa	ADRA2C	ENSSSCG00000008703
	Dog	Canis lupus familiaris	ADRA2C	ENSCAFG00000014602
	Chicken	Gallus gallus	ADRA2C	ENSGALG00000015608
	Flycatcher	Ficedula albicollis	ADRA2C	ENSFALG00000014832
	Anole lizard	Anolis carolinensis	ADRA2D	ENSACAG00000006320
	Chicken	Gallus gallus	ADRA2D	ENSGALG00000035457
	Flycatcher	Ficedula albicollis	ADRA2D	ENSFALG00000008752
	Turkey	Meleagris gallopavo	ADRA2D	ENSMGAG00000015447
	Human	Homo sapiens	ADRB1	ENSG00000043591
	Mouse	Mus musculus	ADRB1	ENSMUSG00000035283
	Rat	Rattus norvegicus	ADRB1	ENSRNOG00000017002
	Cow	Bos taurus	ADRB1	ENSBTAG00000001242
	Dog	Canis lupus familiaris	ADRB1	ENSCAFG00000011219
	Chicken	Gallus gallus	ADRB1	ENSGALG00000008949
	Flycatcher	Ficedula albicollis	ADRB1	ENSFALG00000002239
	Human	Homo sapiens	ADRB2	ENSG00000169252
	Mouse	Mus musculus	ADRB2	ENSMUSG00000045730
	Rat	Rattus norvegicus	ADRB2	ENSRNOG00000019217
	Cow	Bos taurus	ADRB2	ENSBTAG00000002144
	Dog	Canis lupus familiaris	ADRB2	ENSCAFG00000018339
	Chicken	Gallus gallus	ADRB2	ENSGALG00000040035
	Flycatcher	Ficedula albicollis	ADRB2	ENSFALG00000014433
	Human	Homo sapiens	ADRB3	ENSG00000188778
	Mouse	Mus musculus	ADRB3	ENSMUSG00000031489
	Rat	Rattus norvegicus	ADRB3	ENSRNOG00000012674
	Cow	Bos taurus	ADRB3	ENSBTAG00000017981
	Dog	Canis lupus familiaris	ADRB3	ENSCAFG00000006161
	Chicken	Gallus gallus	ADRB3	ENSGALG00000019018
	Flycatcher	Ficedula albicollis	ADRB3	ENSFALG00000006756
